# Supplementary material for: Frailty Index as a Predictor of Mortality in Middle-Aged and Older People: A Prospective Analysis of Chilean Adults
Source: MDPI journal article supplement (doi:10.3390/ijerph20021195), 2023-01-10
Supplement: s1 [file s1]

**Table S1.** Type of deficits included for the frailty index.

| Type of Deficit                            | Scoring                                           | Prevalence of the Deficit                                   |
|--------------------------------------------|---------------------------------------------------|-------------------------------------------------------------|
| <b>COGNITION</b>                           |                                                   |                                                             |
| Concentration                              | None = 0, mild/moderate = 0.5, severe/extreme = 1 | None = 43.3%, mild/moderate = 47.4%, severe/extreme = 9.3%  |
| Capacity of learning new skills            | None = 0, mild/moderate = 0.5, severe/extreme = 1 | None = 58.7%, mild/moderate = 33.8%, severe/extreme = 7.6%  |
| <b>COMORBIDITIES</b>                       |                                                   |                                                             |
| Acute myocardial infarction                | Yes = 1, No = 0                                   | Yes = 24.2%                                                 |
| Angina                                     | Yes = 1, No = 0                                   | Yes = 15.4%                                                 |
| Stroke                                     | Yes = 1, No = 0                                   | Yes = 17.1%                                                 |
| Peripheral venous disease                  | Yes = 1, No = 0                                   | Yes = 8.3%                                                  |
| Cataracts                                  | Yes = 1, No = 0                                   | Yes = 8.5%                                                  |
| Glaucoma                                   | Yes = 1, No = 0                                   | Yes = 2.9%                                                  |
| High blood pressure                        | Yes = 1, No = 0                                   | Yes = 42.5%                                                 |
| Diabetes                                   | Yes = 1, No = 0                                   | Yes = 10.3%                                                 |
| High cholesterol                           | Yes = 1, No = 0                                   | Yes = 27.6%                                                 |
| Chronic bronchitis/asthma                  | Yes = 1, No = 0                                   | Yes = 11.1%                                                 |
| Arthritis                                  | Yes = 1, No = 0                                   | Yes = 4.4%                                                  |
| Knee osteoarthritis                        | Yes = 1, No = 0                                   | Yes = 6.3%                                                  |
| Hip osteoarthritis                         | Yes = 1, No = 0                                   | Yes = 4.1%                                                  |
| Gastric cancer                             | Yes = 1, No = 0                                   | Yes = 4.1%                                                  |
| Colon cancer                               | Yes = 1, No = 0                                   | Yes = 13.9%                                                 |
| Bladder cancer                             | Yes = 1, No = 0                                   | Yes = 6.7%                                                  |
| <b>DIFFICULTY FOR</b>                      |                                                   |                                                             |
| Walking or climbing steps                  | None = 0, mild/moderate = 0.5, severe/extreme = 1 | None = 65.8%, mild/moderate = 26.6%, severe/extreme = 7.6%  |
| Dressing and bathing                       | None = 0, mild/moderate = 0.5, severe/extreme = 1 | None = 93.9%, mild/moderate = 3.6%, severe/extreme = 2.5%   |
| Personal aspects (shaving, brushing, etc.) | None = 0, mild/moderate = 0.5, severe/extreme = 1 | None = 94.8%, mild/moderate = 3.3%, severe/extreme = 1.9%   |
| Going out of the house                     | None = 0, mild/moderate = 0.5, severe/extreme = 1 | None = 82.1%, mild/moderate = 13.9%, severe/extreme = 4%    |
| Community activities                       | None = 0, mild/moderate = 0.5, severe/extreme = 1 | None = 69.9%, mild/moderate = 17.7%, severe/extreme = 12.4% |
| House chores                               | None = 0, mild/moderate = 0.5, severe/extreme = 1 | None = 57.3%, mild/moderate = 27.5%, severe/extreme = 15.2% |
| Intense activities                         | None = 0, mild/moderate = 0.5, severe/extreme = 1 | None = 46.5%, mild/moderate = 14.1%, severe/extreme = 39.4% |
| Trouble solving problems                   | Not at all = 0, Moderate = 0.5, Very = 1          | Not at all = 83.4%, Moderate = 10.2%, Very = 6.4%           |
| <b>MENTAL HEALTH</b>                       |                                                   |                                                             |
| Feeling down, depressed, or hopeless       | Not at all = 0, Moderate = 0.5, Very = 1          | Not at all = 54.8%, Moderate = 29.8%, Very = 15.4%          |

|                                  |                                                      |                                                                |
|----------------------------------|------------------------------------------------------|----------------------------------------------------------------|
| Suspected depression             | Yes = 1, No = 0                                      | Yes = 15.9%                                                    |
| Trouble sleeping                 | Yes = 1, No = 0                                      | Yes = 35.1%                                                    |
| Anxiety                          | Yes = 1, No = 0                                      | Yes = 38.6%                                                    |
| SELF-REPORT OF HEALTH AND STATUS |                                                      |                                                                |
| Self-rated health                | Very good/good = 0, fair = 0.5, poor/very poor = 1   | Very good/good = 49.2% fair = 42.3%, poor/very poor = 8.5%     |
| Perception of personal energy    | Very good/good = 0, fair = 0.5, poor/very poor = 1   | Very good/good = 59.2%, fair = 37.6%, poor/very poor = 3.2%    |
| Self-rated pain                  | Never = 0, rarely/sometimes = 0.5, usually = 1       | Never = 27.9%, rarely/sometimes = 55.3% usually = 16.8%        |
| ANTHROPOMETRY AND OTHERS         |                                                      |                                                                |
| Body mass index                  | Underweight/obese = 1, overweight = 0.5, healthy = 0 | Underweight/obese = 30.7%, overweight = 40.1%, healthy = 29.2% |
| Falls in last year               | Yes = 1, No = 0                                      | Yes = 28.6%                                                    |
| Physical activity                | 80 <sup>th</sup> percentile = 0, other = 1           | Other = 25.5%                                                  |
